# Supplementary material for: Higher Magnesium Intake Reduces Risk of Impaired Glucose and Insulin Metabolism and Progression From Prediabetes to Diabetes in Middle-Aged Americans
Source: PubMed Central journal article supplement — Diabetes Care. 2014 Jan 11;37(2):419–27. doi: 10.2337/dc13-1397 (PMC3898748; doi:10.2337/dc13-1397), 2014-01-11
Supplement: supp_dc13-1397v131397_DC131397SupplementaryData.pdf [file supp_dc13-1397v131397_DC131397SupplementaryData.pdf]

SUPPLEMENTARY DATA

**Supplementary Table 1.** Criteria underlying definitions of metabolic impairment.

|                   |                          | Defining criteria                      |                           |
|-------------------|--------------------------|----------------------------------------|---------------------------|
| Indicator         | Normal                   | Impaired                               | Type 2 diabetes*          |
| Fasting glucose   | <5.6 mmol/L (<100 mg/dL) | ≥5.6 but <7.0 mmol/L (100–<126 mg/dL)  | ≥7.0 mmol/L (≥126 mg/dL)  |
| 2-hr OGTT glucose | <7.8 mmol/L (<140 mg/dL) | ≥7.8 but <11.1 mmol/L (140–<200 mg/dL) | ≥11.1 mmol/L (≥200 mg/dL) |
| Fasting insulin   | <90th percentile†        | ≥90th percentile                       | --                        |
| HOMA-IR           | <90th percentile‡        | ≥90th percentile                       | --                        |

\* Or by reported diagnosis of type 2 diabetes, or reported use of an oral hypoglycemic drug or insulin. HOMA-IR, homeostasis model assessment of insulin resistance; OGTT, oral glucose tolerance test.

† In this sample, baseline cut-point of 41.0; incident cut-point of 25.0.

‡ In this sample, baseline cut-point of 10.1; incident cut-point of 6.7.
